# Supplementary material
Source: publisher figshare collection journal article supplement (https://acs.figshare.com/ndownloader/files/9361171)
Supplement: Supplementary file 1 [file 9361171]

  
data_PUSLCS15 
  
_audit_creation_method            SHELXL-97 
_chemical_name_systematic 
; 
 ? 
; 
_chemical_name_common             ? 
_chemical_melting_point           ? 
_chemical_formula_moiety 
 'C21 H32 O3 Si' 
_chemical_formula_sum 
 'C21 H32 O3 Si' 
_chemical_formula_weight          360.56 
  
loop_ 
 _atom_type_symbol 
 _atom_type_description 
 _atom_type_scat_dispersion_real 
 _atom_type_scat_dispersion_imag 
 _atom_type_scat_source 
 'C'  'C'   0.0033   0.0016 
 'International Tables Vol C Tables 4.2.6.8 and 6.1.1.4' 
 'H'  'H'   0.0000   0.0000 
 'International Tables Vol C Tables 4.2.6.8 and 6.1.1.4' 
 'O'  'O'   0.0106   0.0060 
 'International Tables Vol C Tables 4.2.6.8 and 6.1.1.4' 
 'Si'  'Si'   0.0817   0.0704 
 'International Tables Vol C Tables 4.2.6.8 and 6.1.1.4' 
  
_symmetry_cell_setting            Triclinic 
_symmetry_space_group_name_H-M    'P -1'
_symmetry_space_group_name_Hall   '-P 1' 
  
loop_ 
 _symmetry_equiv_pos_as_xyz 
 'x, y, z' 
 '-x, -y, -z' 
  
_cell_length_a                    7.3119(5) 
_cell_length_b                    11.5520(9) 
_cell_length_c                    12.6325(10) 
_cell_angle_alpha                 104.8535(24) 
_cell_angle_beta                  97.6124(22) 
_cell_angle_gamma                 94.5246(23) 
_cell_volume                      1015.17(13) 
_cell_formula_units_Z             2 
_cell_measurement_temperature     296(2) 
_cell_measurement_reflns_used     9743 
_cell_measurement_theta_min       3.38 
_cell_measurement_theta_max       27.11 
  
_exptl_crystal_description        Prism 
_exptl_crystal_colour             colourless 
_exptl_crystal_size_max           0.44 
_exptl_crystal_size_mid           0.36 
_exptl_crystal_size_min           0.16 
_exptl_crystal_density_meas       . 
_exptl_crystal_density_diffrn     1.180 
_exptl_crystal_density_method     'not measured' 
_exptl_crystal_F_000              392 
_exptl_absorpt_coefficient_mu     0.132 
_exptl_absorpt_correction_type    multi-scan 
_exptl_absorpt_correction_T_min   0.9443 
_exptl_absorpt_correction_T_max   0.9792 
_exptl_absorpt_process_details    'SAINT ver 8.34A; BRUKER SADABS' 
  
_exptl_special_details 
; 
 ? 
; 
  
_diffrn_ambient_temperature       296(2) 
_diffrn_radiation_wavelength      0.71073 
_diffrn_radiation_type            MoK\a 
_diffrn_radiation_source          'micro-focus sealed tube' 
_diffrn_radiation_monochromator   graphite 
_diffrn_measurement_device_type   'Photon-100 CMOS area detector' 
_diffrn_measurement_method        'phi and omega scans' 
_diffrn_reflns_number             57802 
_diffrn_reflns_av_R_equivalents   0.0326 
_diffrn_reflns_av_sigmaI/netI     0.0173 
_diffrn_reflns_limit_h_min        -9 
_diffrn_reflns_limit_h_max        9 
_diffrn_reflns_limit_k_min        -14 
_diffrn_reflns_limit_k_max        15 
_diffrn_reflns_limit_l_min        -16 
_diffrn_reflns_limit_l_max        16 
_diffrn_reflns_theta_min          2.81 
_diffrn_reflns_theta_max          27.53 
_reflns_number_total              4662 
_reflns_number_gt                 3773 
_reflns_threshold_expression      >2sigma(I) 
  
_computing_data_collection        'Bruker APEX3' 
_computing_cell_refinement        'Bruker APEX3' 
_computing_data_reduction         'Bruker SAINT' 
_computing_structure_solution     'SHELXS-97 (Sheldrick, 1990)' 
_computing_structure_refinement   'SHELXL-97 (Sheldrick, 1997)' 
_computing_molecular_graphics     'Bruker SHELXTL' 
_computing_publication_material   'Bruker SHELXTL' 
  
_refine_special_details 
; 
 Refinement of F^2^ against ALL reflections.  The weighted R-factor wR and 
 goodness of fit S are based on F^2^, conventional R-factors R are based 
 on F, with F set to zero for negative F^2^. The threshold expression of 
 F^2^ > 2sigma(F^2^) is used only for calculating R-factors(gt) etc. and is 
 not relevant to the choice of reflections for refinement.  R-factors based 
 on F^2^ are statistically about twice as large as those based on F, and R- 
 factors based on ALL data will be even larger. 
; 
  
_refine_ls_structure_factor_coef  Fsqd 
_refine_ls_matrix_type            full 
_refine_ls_weighting_scheme       calc 
_refine_ls_weighting_details 
 'calc w=1/[\s^2^(Fo^2^)+(0.0675P)^2^+0.3175P] where P=(Fo^2^+2Fc^2^)/3' 
_atom_sites_solution_primary      direct 
_atom_sites_solution_secondary    difmap 
_atom_sites_solution_hydrogens    geom 
_refine_ls_hydrogen_treatment     mixed 
_refine_ls_extinction_method      none 
_refine_ls_extinction_coef        ? 
_refine_ls_number_reflns          4662 
_refine_ls_number_parameters      239 
_refine_ls_number_restraints      0 
_refine_ls_R_factor_all           0.0646 
_refine_ls_R_factor_gt            0.0511 
_refine_ls_wR_factor_ref          0.1435 
_refine_ls_wR_factor_gt           0.1342 
_refine_ls_goodness_of_fit_ref    1.052 
_refine_ls_restrained_S_all       1.052 
_refine_ls_shift/su_max           0.001 
_refine_ls_shift/su_mean          0.000 
  
loop_ 
 _atom_site_label 
 _atom_site_type_symbol 
 _atom_site_fract_x 
 _atom_site_fract_y 
 _atom_site_fract_z 
 _atom_site_U_iso_or_equiv 
 _atom_site_adp_type 
 _atom_site_occupancy 
 _atom_site_symmetry_multiplicity 
 _atom_site_calc_flag 
 _atom_site_refinement_flags 
 _atom_site_disorder_assembly 
 _atom_site_disorder_group 
Si1 Si 0.23449(7) 0.79754(5) 0.07503(4) 0.05390(17) Uani 1 1 d . . . 
O1 O 0.7805(2) 0.55257(14) 0.39716(13) 0.0751(4) Uani 1 1 d . . . 
O2 O 0.23625(18) 0.92270(12) 0.32975(11) 0.0598(3) Uani 1 1 d . . . 
O3 O 0.41140(17) 0.78005(12) 0.16090(9) 0.0538(3) Uani 1 1 d . . . 
C1 C 0.7593(2) 0.64735(17) 0.45849(15) 0.0514(4) Uani 1 1 d . . . 
C2 C 0.8472(3) 0.6832(2) 0.57825(17) 0.0692(6) Uani 1 1 d . . . 
H2A H 0.9610 0.7363 0.5870 0.083 Uiso 1 1 calc R . . 
H2B H 0.8800 0.6116 0.5994 0.083 Uiso 1 1 calc R . . 
C3 C 0.7224(4) 0.7464(2) 0.65566(17) 0.0769(6) Uani 1 1 d . . . 
H3A H 0.7691 0.8313 0.6835 0.092 Uiso 1 1 calc R . . 
H3B H 0.7252 0.7126 0.7186 0.092 Uiso 1 1 calc R . . 
C4 C 0.5234(3) 0.7335(2) 0.59770(17) 0.0701(6) Uani 1 1 d . . . 
H4A H 0.4463 0.7720 0.6500 0.084 Uiso 1 1 calc R . . 
H4B H 0.4758 0.6487 0.5697 0.084 Uiso 1 1 calc R . . 
C5 C 0.5160(2) 0.79177(16) 0.50187(13) 0.0474(4) Uani 1 1 d . . . 
H5A H 0.5636 0.8771 0.5337 0.057 Uiso 1 1 calc R . . 
C6 C 0.6458(2) 0.73644(14) 0.41781(13) 0.0419(3) Uani 1 1 d . . . 
C7 C 0.5294(2) 0.68284(14) 0.30292(13) 0.0426(3) Uani 1 1 d . . . 
H7A H 0.6082 0.6427 0.2512 0.051 Uiso 1 1 calc R . . 
C8 C 0.3626(3) 0.59514(16) 0.30191(17) 0.0579(5) Uani 1 1 d . . . 
H8A H 0.4049 0.5258 0.3235 0.069 Uiso 1 1 calc R . . 
H8B H 0.2929 0.5670 0.2274 0.069 Uiso 1 1 calc R . . 
C9 C 0.2363(3) 0.65591(19) 0.3819(2) 0.0646(5) Uani 1 1 d . . . 
H9A H 0.2242 0.6122 0.4372 0.077 Uiso 1 1 calc R . . 
H9B H 0.1136 0.6548 0.3413 0.077 Uiso 1 1 calc R . . 
C10 C 0.3204(2) 0.78686(17) 0.43902(15) 0.0516(4) Uani 1 1 d . . . 
H10A H 0.2401 0.8271 0.4897 0.062 Uiso 1 1 calc R . . 
C11 C 0.3317(2) 0.84701(15) 0.34770(14) 0.0451(4) Uani 1 1 d . . . 
C12 C 0.4752(2) 0.79806(14) 0.27361(12) 0.0416(3) Uani 1 1 d . . . 
C13 C 0.6552(2) 0.88403(15) 0.31454(13) 0.0457(4) Uani 1 1 d . . . 
C14 C 0.6990(3) 0.9765(2) 0.2771(2) 0.0687(6) Uani 1 1 d . . . 
H14A H 0.817(4) 1.026(2) 0.307(2) 0.086(7) Uiso 1 1 d . . . 
H14B H 0.611(4) 0.993(2) 0.220(2) 0.083(7) Uiso 1 1 d . . . 
C15 C 0.7749(2) 0.83830(17) 0.39774(15) 0.0511(4) Uani 1 1 d . . . 
H15A H 0.8162 0.9016 0.4659 0.061 Uiso 1 1 calc R . . 
H15B H 0.8827 0.8075 0.3683 0.061 Uiso 1 1 calc R . . 
C16 C 0.0075(3) 0.7488(3) 0.1090(2) 0.0919(9) Uani 1 1 d . . . 
H16A H 0.0136 0.6742 0.1289 0.138 Uiso 1 1 calc R . . 
H16B H -0.0871 0.7376 0.0457 0.138 Uiso 1 1 calc R . . 
H16C H -0.0218 0.8094 0.1701 0.138 Uiso 1 1 calc R . . 
C17 C 0.2439(5) 0.9564(2) 0.0679(3) 0.1007(9) Uani 1 1 d . . . 
H17A H 0.2121 1.0060 0.1348 0.151 Uiso 1 1 calc R . . 
H17B H 0.1573 0.9613 0.0055 0.151 Uiso 1 1 calc R . . 
H17C H 0.3672 0.9841 0.0596 0.151 Uiso 1 1 calc R . . 
C18 C 0.2723(3) 0.6970(2) -0.06109(16) 0.0672(6) Uani 1 1 d . . . 
C19 C 0.2518(6) 0.5666(3) -0.0560(3) 0.1262(13) Uani 1 1 d . . . 
H19A H 0.2673 0.5146 -0.1260 0.189 Uiso 1 1 calc R . . 
H19B H 0.1305 0.5462 -0.0400 0.189 Uiso 1 1 calc R . . 
H19C H 0.3446 0.5567 0.0013 0.189 Uiso 1 1 calc R . . 
C20 C 0.4644(5) 0.7246(4) -0.0858(3) 0.1157(11) Uani 1 1 d . . . 
H20A H 0.4812 0.6683 -0.1533 0.174 Uiso 1 1 calc R . . 
H20B H 0.5551 0.7182 -0.0260 0.174 Uiso 1 1 calc R . . 
H20C H 0.4792 0.8050 -0.0940 0.174 Uiso 1 1 calc R . . 
C21 C 0.1303(6) 0.7103(5) -0.1558(3) 0.159(2) Uani 1 1 d . . . 
H21A H 0.1584 0.6639 -0.2251 0.238 Uiso 1 1 calc R . . 
H21B H 0.1348 0.7937 -0.1554 0.238 Uiso 1 1 calc R . . 
H21C H 0.0082 0.6817 -0.1464 0.238 Uiso 1 1 calc R . . 
  
loop_ 
 _atom_site_aniso_label 
 _atom_site_aniso_U_11 
 _atom_site_aniso_U_22 
 _atom_site_aniso_U_33 
 _atom_site_aniso_U_23 
 _atom_site_aniso_U_13 
 _atom_site_aniso_U_12 
Si1 0.0500(3) 0.0568(3) 0.0491(3) 0.0060(2) -0.0012(2) 0.0147(2) 
O1 0.0831(10) 0.0695(9) 0.0700(9) 0.0091(7) 0.0048(8) 0.0368(8) 
O2 0.0578(8) 0.0578(8) 0.0645(8) 0.0109(6) 0.0133(6) 0.0232(6) 
O3 0.0517(7) 0.0694(8) 0.0393(6) 0.0103(5) 0.0056(5) 0.0181(6) 
C1 0.0472(9) 0.0576(10) 0.0520(9) 0.0172(8) 0.0093(7) 0.0112(8) 
C2 0.0710(13) 0.0818(14) 0.0569(11) 0.0246(10) 0.0001(10) 0.0178(11) 
C3 0.0955(17) 0.0904(16) 0.0470(11) 0.0212(11) 0.0079(11) 0.0216(13) 
C4 0.0795(14) 0.0894(15) 0.0561(11) 0.0323(11) 0.0290(10) 0.0247(12) 
C5 0.0540(9) 0.0472(9) 0.0414(8) 0.0082(7) 0.0151(7) 0.0090(7) 
C6 0.0398(8) 0.0446(8) 0.0401(8) 0.0082(6) 0.0078(6) 0.0056(6) 
C7 0.0412(8) 0.0428(8) 0.0404(8) 0.0032(6) 0.0080(6) 0.0096(6) 
C8 0.0547(10) 0.0434(9) 0.0681(12) 0.0070(8) 0.0031(9) -0.0003(8) 
C9 0.0452(10) 0.0655(12) 0.0852(14) 0.0240(11) 0.0158(9) -0.0021(9) 
C10 0.0476(9) 0.0571(10) 0.0536(9) 0.0117(8) 0.0228(8) 0.0139(8) 
C11 0.0390(8) 0.0433(8) 0.0471(9) 0.0014(7) 0.0062(7) 0.0063(7) 
C12 0.0403(8) 0.0447(8) 0.0376(7) 0.0065(6) 0.0062(6) 0.0074(6) 
C13 0.0431(8) 0.0492(9) 0.0444(8) 0.0100(7) 0.0115(7) 0.0046(7) 
C14 0.0629(13) 0.0677(13) 0.0786(14) 0.0315(11) 0.0058(11) -0.0034(10) 
C15 0.0397(8) 0.0622(11) 0.0505(9) 0.0163(8) 0.0064(7) -0.0018(7) 
C16 0.0502(12) 0.117(2) 0.0848(17) -0.0127(15) 0.0081(11) 0.0050(13) 
C17 0.126(2) 0.0719(16) 0.101(2) 0.0250(14) -0.0091(17) 0.0347(16) 
C18 0.0707(13) 0.0813(15) 0.0427(10) 0.0064(9) 0.0013(9) 0.0150(11) 
C19 0.190(4) 0.0732(18) 0.109(2) -0.0121(16) 0.073(3) 0.016(2) 
C20 0.110(2) 0.154(3) 0.0757(17) 0.0103(18) 0.0416(17) 0.000(2) 
C21 0.157(4) 0.228(5) 0.0611(17) -0.006(2) -0.0324(19) 0.084(3) 
  
_geom_special_details 
; 
 All esds (except the esd in the dihedral angle between two l.s. planes) 
 are estimated using the full covariance matrix.  The cell esds are taken 
 into account individually in the estimation of esds in distances, angles 
 and torsion angles; correlations between esds in cell parameters are only 
 used when they are defined by crystal symmetry.  An approximate (isotropic) 
 treatment of cell esds is used for estimating esds involving l.s. planes. 
; 
  
loop_ 
 _geom_bond_atom_site_label_1 
 _geom_bond_atom_site_label_2 
 _geom_bond_distance 
 _geom_bond_site_symmetry_2 
 _geom_bond_publ_flag 
Si1 O3 1.6348(13) . ? 
Si1 C16 1.850(2) . ? 
Si1 C17 1.857(3) . ? 
Si1 C18 1.880(2) . ? 
O1 C1 1.203(2) . ? 
O2 C11 1.208(2) . ? 
O3 C12 1.3947(18) . ? 
C1 C2 1.501(3) . ? 
C1 C6 1.518(2) . ? 
C2 C3 1.516(3) . ? 
C2 H2A 0.9700 . ? 
C2 H2B 0.9700 . ? 
C3 C4 1.517(3) . ? 
C3 H3A 0.9700 . ? 
C3 H3B 0.9700 . ? 
C4 C5 1.526(3) . ? 
C4 H4A 0.9700 . ? 
C4 H4B 0.9700 . ? 
C5 C10 1.531(3) . ? 
C5 C6 1.565(2) . ? 
C5 H5A 0.9800 . ? 
C6 C7 1.531(2) . ? 
C6 C15 1.543(2) . ? 
C7 C8 1.519(2) . ? 
C7 C12 1.537(2) . ? 
C7 H7A 0.9800 . ? 
C8 C9 1.534(3) . ? 
C8 H8A 0.9700 . ? 
C8 H8B 0.9700 . ? 
C9 C10 1.537(3) . ? 
C9 H9A 0.9700 . ? 
C9 H9B 0.9700 . ? 
C10 C11 1.499(3) . ? 
C10 H10A 0.9800 . ? 
C11 C12 1.543(2) . ? 
C12 C13 1.528(2) . ? 
C13 C14 1.308(3) . ? 
C13 C15 1.504(2) . ? 
C14 H14A 0.97(3) . ? 
C14 H14B 0.97(3) . ? 
C15 H15A 0.9700 . ? 
C15 H15B 0.9700 . ? 
C16 H16A 0.9600 . ? 
C16 H16B 0.9600 . ? 
C16 H16C 0.9600 . ? 
C17 H17A 0.9600 . ? 
C17 H17B 0.9600 . ? 
C17 H17C 0.9600 . ? 
C18 C20 1.506(4) . ? 
C18 C19 1.520(4) . ? 
C18 C21 1.524(3) . ? 
C19 H19A 0.9600 . ? 
C19 H19B 0.9600 . ? 
C19 H19C 0.9600 . ? 
C20 H20A 0.9600 . ? 
C20 H20B 0.9600 . ? 
C20 H20C 0.9600 . ? 
C21 H21A 0.9600 . ? 
C21 H21B 0.9600 . ? 
C21 H21C 0.9600 . ? 
  
loop_ 
 _geom_angle_atom_site_label_1 
 _geom_angle_atom_site_label_2 
 _geom_angle_atom_site_label_3 
 _geom_angle 
 _geom_angle_site_symmetry_1 
 _geom_angle_site_symmetry_3 
 _geom_angle_publ_flag 
O3 Si1 C16 113.23(11) . . ? 
O3 Si1 C17 110.75(11) . . ? 
C16 Si1 C17 110.12(15) . . ? 
O3 Si1 C18 102.42(8) . . ? 
C16 Si1 C18 110.13(11) . . ? 
C17 Si1 C18 109.94(13) . . ? 
C12 O3 Si1 142.03(11) . . ? 
O1 C1 C2 121.15(17) . . ? 
O1 C1 C6 121.57(17) . . ? 
C2 C1 C6 117.27(16) . . ? 
C1 C2 C3 113.33(18) . . ? 
C1 C2 H2A 108.9 . . ? 
C3 C2 H2A 108.9 . . ? 
C1 C2 H2B 108.9 . . ? 
C3 C2 H2B 108.9 . . ? 
H2A C2 H2B 107.7 . . ? 
C2 C3 C4 111.69(18) . . ? 
C2 C3 H3A 109.3 . . ? 
C4 C3 H3A 109.3 . . ? 
C2 C3 H3B 109.3 . . ? 
C4 C3 H3B 109.3 . . ? 
H3A C3 H3B 107.9 . . ? 
C3 C4 C5 109.75(18) . . ? 
C3 C4 H4A 109.7 . . ? 
C5 C4 H4A 109.7 . . ? 
C3 C4 H4B 109.7 . . ? 
C5 C4 H4B 109.7 . . ? 
H4A C4 H4B 108.2 . . ? 
C4 C5 C10 114.28(16) . . ? 
C4 C5 C6 111.62(15) . . ? 
C10 C5 C6 109.31(13) . . ? 
C4 C5 H5A 107.1 . . ? 
C10 C5 H5A 107.1 . . ? 
C6 C5 H5A 107.1 . . ? 
C1 C6 C7 113.53(14) . . ? 
C1 C6 C15 110.38(14) . . ? 
C7 C6 C15 101.94(13) . . ? 
C1 C6 C5 111.60(13) . . ? 
C7 C6 C5 109.23(13) . . ? 
C15 C6 C5 109.73(14) . . ? 
C8 C7 C6 113.87(14) . . ? 
C8 C7 C12 113.14(14) . . ? 
C6 C7 C12 100.75(12) . . ? 
C8 C7 H7A 109.6 . . ? 
C6 C7 H7A 109.6 . . ? 
C12 C7 H7A 109.6 . . ? 
C7 C8 C9 110.65(15) . . ? 
C7 C8 H8A 109.5 . . ? 
C9 C8 H8A 109.5 . . ? 
C7 C8 H8B 109.5 . . ? 
C9 C8 H8B 109.5 . . ? 
H8A C8 H8B 108.1 . . ? 
C8 C9 C10 109.43(15) . . ? 
C8 C9 H9A 109.8 . . ? 
C10 C9 H9A 109.8 . . ? 
C8 C9 H9B 109.8 . . ? 
C10 C9 H9B 109.8 . . ? 
H9A C9 H9B 108.2 . . ? 
C11 C10 C5 109.13(14) . . ? 
C11 C10 C9 105.87(16) . . ? 
C5 C10 C9 111.05(15) . . ? 
C11 C10 H10A 110.2 . . ? 
C5 C10 H10A 110.2 . . ? 
C9 C10 H10A 110.2 . . ? 
O2 C11 C10 125.02(15) . . ? 
O2 C11 C12 122.32(16) . . ? 
C10 C11 C12 112.61(14) . . ? 
O3 C12 C13 112.88(13) . . ? 
O3 C12 C7 113.24(13) . . ? 
C13 C12 C7 102.59(13) . . ? 
O3 C12 C11 112.98(13) . . ? 
C13 C12 C11 107.70(12) . . ? 
C7 C12 C11 106.70(13) . . ? 
C14 C13 C15 126.95(18) . . ? 
C14 C13 C12 124.80(18) . . ? 
C15 C13 C12 108.13(14) . . ? 
C13 C14 H14A 119.8(15) . . ? 
C13 C14 H14B 118.4(15) . . ? 
H14A C14 H14B 122(2) . . ? 
C13 C15 C6 103.91(13) . . ? 
C13 C15 H15A 111.0 . . ? 
C6 C15 H15A 111.0 . . ? 
C13 C15 H15B 111.0 . . ? 
C6 C15 H15B 111.0 . . ? 
H15A C15 H15B 109.0 . . ? 
Si1 C16 H16A 109.5 . . ? 
Si1 C16 H16B 109.5 . . ? 
H16A C16 H16B 109.5 . . ? 
Si1 C16 H16C 109.5 . . ? 
H16A C16 H16C 109.5 . . ? 
H16B C16 H16C 109.5 . . ? 
Si1 C17 H17A 109.5 . . ? 
Si1 C17 H17B 109.5 . . ? 
H17A C17 H17B 109.5 . . ? 
Si1 C17 H17C 109.5 . . ? 
H17A C17 H17C 109.5 . . ? 
H17B C17 H17C 109.5 . . ? 
C20 C18 C19 107.4(3) . . ? 
C20 C18 C21 108.7(3) . . ? 
C19 C18 C21 109.0(3) . . ? 
C20 C18 Si1 111.87(18) . . ? 
C19 C18 Si1 109.11(17) . . ? 
C21 C18 Si1 110.67(19) . . ? 
C18 C19 H19A 109.5 . . ? 
C18 C19 H19B 109.5 . . ? 
H19A C19 H19B 109.5 . . ? 
C18 C19 H19C 109.5 . . ? 
H19A C19 H19C 109.5 . . ? 
H19B C19 H19C 109.5 . . ? 
C18 C20 H20A 109.5 . . ? 
C18 C20 H20B 109.5 . . ? 
H20A C20 H20B 109.5 . . ? 
C18 C20 H20C 109.5 . . ? 
H20A C20 H20C 109.5 . . ? 
H20B C20 H20C 109.5 . . ? 
C18 C21 H21A 109.5 . . ? 
C18 C21 H21B 109.5 . . ? 
H21A C21 H21B 109.5 . . ? 
C18 C21 H21C 109.5 . . ? 
H21A C21 H21C 109.5 . . ? 
H21B C21 H21C 109.5 . . ? 
  
loop_ 
 _geom_torsion_atom_site_label_1 
 _geom_torsion_atom_site_label_2 
 _geom_torsion_atom_site_label_3 
 _geom_torsion_atom_site_label_4 
 _geom_torsion 
 _geom_torsion_site_symmetry_1 
 _geom_torsion_site_symmetry_2 
 _geom_torsion_site_symmetry_3 
 _geom_torsion_site_symmetry_4 
 _geom_torsion_publ_flag 
C16 Si1 O3 C12 -44.6(2) . . . . ? 
C17 Si1 O3 C12 79.7(2) . . . . ? 
C18 Si1 O3 C12 -163.15(19) . . . . ? 
O1 C1 C2 C3 -140.6(2) . . . . ? 
C6 C1 C2 C3 40.4(3) . . . . ? 
C1 C2 C3 C4 13.0(3) . . . . ? 
C2 C3 C4 C5 -61.6(3) . . . . ? 
C3 C4 C5 C10 -178.52(16) . . . . ? 
C3 C4 C5 C6 56.8(2) . . . . ? 
O1 C1 C6 C7 13.0(2) . . . . ? 
C2 C1 C6 C7 -168.00(16) . . . . ? 
O1 C1 C6 C15 -100.7(2) . . . . ? 
C2 C1 C6 C15 78.3(2) . . . . ? 
O1 C1 C6 C5 136.98(19) . . . . ? 
C2 C1 C6 C5 -44.0(2) . . . . ? 
C4 C5 C6 C1 -5.3(2) . . . . ? 
C10 C5 C6 C1 -132.74(15) . . . . ? 
C4 C5 C6 C7 121.03(17) . . . . ? 
C10 C5 C6 C7 -6.39(18) . . . . ? 
C4 C5 C6 C15 -128.01(17) . . . . ? 
C10 C5 C6 C15 104.57(16) . . . . ? 
C1 C6 C7 C8 72.60(18) . . . . ? 
C15 C6 C7 C8 -168.69(14) . . . . ? 
C5 C6 C7 C8 -52.64(18) . . . . ? 
C1 C6 C7 C12 -165.97(13) . . . . ? 
C15 C6 C7 C12 -47.27(15) . . . . ? 
C5 C6 C7 C12 68.78(15) . . . . ? 
C6 C7 C8 C9 57.1(2) . . . . ? 
C12 C7 C8 C9 -57.1(2) . . . . ? 
C7 C8 C9 C10 -0.6(2) . . . . ? 
C4 C5 C10 C11 179.84(16) . . . . ? 
C6 C5 C10 C11 -54.26(18) . . . . ? 
C4 C5 C10 C9 -63.8(2) . . . . ? 
C6 C5 C10 C9 62.07(19) . . . . ? 
C8 C9 C10 C11 60.1(2) . . . . ? 
C8 C9 C10 C5 -58.3(2) . . . . ? 
C5 C10 C11 O2 -130.80(17) . . . . ? 
C9 C10 C11 O2 109.61(19) . . . . ? 
C5 C10 C11 C12 51.61(18) . . . . ? 
C9 C10 C11 C12 -67.98(17) . . . . ? 
Si1 O3 C12 C13 -119.12(18) . . . . ? 
Si1 O3 C12 C7 124.86(17) . . . . ? 
Si1 O3 C12 C11 3.4(3) . . . . ? 
C8 C7 C12 O3 -74.85(17) . . . . ? 
C6 C7 C12 O3 163.21(12) . . . . ? 
C8 C7 C12 C13 163.19(14) . . . . ? 
C6 C7 C12 C13 41.25(14) . . . . ? 
C8 C7 C12 C11 50.08(17) . . . . ? 
C6 C7 C12 C11 -71.86(14) . . . . ? 
O2 C11 C12 O3 -40.2(2) . . . . ? 
C10 C11 C12 O3 137.44(15) . . . . ? 
O2 C11 C12 C13 85.13(19) . . . . ? 
C10 C11 C12 C13 -97.21(16) . . . . ? 
O2 C11 C12 C7 -165.31(16) . . . . ? 
C10 C11 C12 C7 12.35(18) . . . . ? 
O3 C12 C13 C14 33.9(2) . . . . ? 
C7 C12 C13 C14 156.07(19) . . . . ? 
C11 C12 C13 C14 -91.6(2) . . . . ? 
O3 C12 C13 C15 -142.28(14) . . . . ? 
C7 C12 C13 C15 -20.06(16) . . . . ? 
C11 C12 C13 C15 92.30(16) . . . . ? 
C14 C13 C15 C6 174.9(2) . . . . ? 
C12 C13 C15 C6 -9.10(17) . . . . ? 
C1 C6 C15 C13 155.84(14) . . . . ? 
C7 C6 C15 C13 34.92(16) . . . . ? 
C5 C6 C15 C13 -80.76(16) . . . . ? 
O3 Si1 C18 C20 -52.9(2) . . . . ? 
C16 Si1 C18 C20 -173.6(2) . . . . ? 
C17 Si1 C18 C20 64.9(2) . . . . ? 
O3 Si1 C18 C19 65.8(2) . . . . ? 
C16 Si1 C18 C19 -54.9(2) . . . . ? 
C17 Si1 C18 C19 -176.4(2) . . . . ? 
O3 Si1 C18 C21 -174.3(3) . . . . ? 
C16 Si1 C18 C21 65.0(3) . . . . ? 
C17 Si1 C18 C21 -56.5(3) . . . . ? 
  
_diffrn_measured_fraction_theta_max    0.997 
_diffrn_reflns_theta_full              27.53 
_diffrn_measured_fraction_theta_full   0.997 
_refine_diff_density_max    0.236 
_refine_diff_density_min   -0.345 
_refine_diff_density_rms    0.042 
